# Supplementary material
Source: PubMed Central journal article supplement (PMC9624178)
Supplement: NIHMS1838418-supplement-Supplement.pdf [file NIHMS1838418-supplement-Supplement.pdf]

## **Supplemental Material**

### **Restoration of somatosensory function by pairing vagus nerve stimulation with tactile rehabilitation**

Michael J. Darrow<sup>1,2</sup>, Tabarak M. Mian<sup>1,3</sup>, Miranda Torres<sup>1,3</sup>, Zainab Haider<sup>1,3</sup>, Tanya Danaphongse<sup>1</sup>, Robert L. Rennaker II<sup>1,2,3</sup>, Michael P. Kilgard<sup>1,2,3</sup>, and Seth A. Hays<sup>1,2,3\*</sup>

#### *Contents*

- I. Supplemental Tables of Data Indexed across Animals
  1. Right (injured) forelimb withdrawal threshold
  2. Intent to Treat (ITT) analysis of injured forelimb withdrawal thresholds
  3. Left (uninjured) forelimb withdrawal threshold
  4. Percentage right paw use on the cylinder task
  5. Right forepaw grip strength .
  6. Forepaw toe spread distance
  7. Percentage of steps with slips or misses on the horizontal ladder task
- II. Supplemental Videos
  1. Delivery of Tactile Rehabilitation

**Table 1. Right (injured) forelimb withdrawal threshold**

| Animal ID | Group     | Week  |       |       |       |       |       |       |       |       |       |       |       |       |
|-----------|-----------|-------|-------|-------|-------|-------|-------|-------|-------|-------|-------|-------|-------|-------|
|           |           | -1    | 8     | 16    | 17    | 18    | 19    | 20    | 21    | 22    | 24    | 26    | 28    | 30    |
| 1         | Rehab     | 7.33  | 29.40 | 30.50 | 27.90 | 23.80 | 23.20 | 18.60 | 24.10 | 20.90 | 23.30 | 25.40 | 22.40 | 25.00 |
| 2         | Rehab     | 6.17  | 31.10 | 28.80 | 27.50 | 23.50 | 21.50 | 23.60 | 19.50 | 19.50 | 26.60 | 27.00 | 27.40 | 23.60 |
| 3         | Rehab     | 10.33 | 27.33 | 26.40 | 25.40 | 22.50 | 28.70 | 27.60 | 22.30 | 23.30 | 23.90 | 25.30 | 30.70 | 22.50 |
| 4         | Rehab     | 7.17  | 26.00 | 24.50 | 21.20 | 23.60 | 20.50 | 22.60 | 23.00 | 23.30 | 25.80 | 26.90 | 25.00 | 22.00 |
| 5         | Rehab     | 7.75  | 28.17 | 26.50 | 24.80 | 22.50 | 23.90 | 21.10 | 19.30 | 22.10 | 23.30 | 20.70 | 21.70 | 22.80 |
| 6         | Rehab     | 8.10  | 29.17 | 25.52 | 20.70 | 26.20 | 25.90 | 25.30 | 28.60 | 25.10 | 24.30 | 23.60 | 23.50 | 23.10 |
| 7         | Rehab     | 10.70 | 31.67 | 32.80 | 28.30 | 26.90 | 26.90 | 28.70 | 25.60 | 26.80 | 23.20 | 25.00 | 25.60 | 26.20 |
| 8         | Rehab     | 8.30  | 23.50 | 22.80 | 23.00 | 20.90 | 21.00 | 25.60 | 24.60 | 25.70 | 23.70 | 23.00 | 23.70 | 24.70 |
| 9         | VNS+Rehab | 8.00  | 32.10 | 29.20 | 26.50 | 23.80 | 11.40 | 18.20 | 8.20  | 9.30  | 10.50 | 7.60  | 13.40 | 5.00  |
| 10        | VNS+Rehab | 9.67  | 28.00 | 25.52 | 13.70 | 11.50 | 6.50  | 6.40  | 10.20 | 11.40 | 10.70 | 12.20 | 12.70 | 7.60  |
| 11        | VNS+Rehab | 5.83  | 26.83 | 24.60 | 14.80 | 12.20 | 17.60 | 12.50 | 11.30 | 12.00 | 11.10 | 11.50 | 12.70 | 8.90  |
| 12        | VNS+Rehab | 7.17  | 24.83 | 23.80 | 12.70 | 19.00 | 11.20 | 9.00  | 7.00  | 13.40 | 6.70  | 10.80 | 6.50  | 6.60  |
| 13        | VNS+Rehab | 7.50  | 27.00 | 27.42 | 15.90 | 12.00 | 14.10 | 12.50 | 11.50 | 11.80 | 13.20 | 11.00 | 10.70 | 10.10 |
| 14        | VNS+Rehab | 9.26  | 31.00 | 28.40 | 14.20 | 12.70 | 15.00 | 11.10 | 6.20  | 12.40 | 8.80  | 11.10 | 9.50  | 9.70  |
| 15        | VNS+Rehab | 10.76 | 32.33 | 28.08 | 15.90 | 14.30 | 11.90 | 7.50  | 9.90  | 9.90  | 5.60  | 6.10  | 8.60  | 9.30  |
| 16        | VNS+Rehab | 9.70  | 24.50 | 29.70 | 15.40 | 15.20 | 11.50 | 8.90  | 7.70  | 9.60  | 10.00 | 9.60  | 11.60 | 10.70 |
| 17        | VNS+Rehab | 5.90  | 27.00 | 28.40 | 13.60 | 14.40 | 12.40 | 8.10  | 7.50  | 9.60  | 11.70 | 7.50  | 9.10  | 9.20  |
| †18       | VNS+Rehab | 6.7   | 29.4  | 32.1  | n.d.  |
| †19       | VNS+Rehab | 6.83  | 24.84 | 26.4  | 17.5  | n.d.  |
| †20       | VNS+Rehab | 8.67  | 27    | 31.1  | 18.4  | 19.1  | 22.5  | 24.1  | 21.8  | 25.8  | n.d.  | n.d.  | n.d.  | n.d.  |
| †21       | VNS+Rehab | 6.5   | 23.5  | 23.5  | 22.6  | 30.4  | 25.4  | 27.2  | 22.3  | 29.4  | n.d.  | n.d.  | n.d.  | n.d.  |

All forces in grams. † indicates subjects that were excluded from the study for VNS device failure (see Methods). n.d. indicates missing data from time points after exclusion for these subjects.

**Table 2. Intent to Treat analysis of injured forelimb withdrawal thresholds**

|              | <b>Week</b> |            |            |                         |                         |                         |                         |                         |                         |
|--------------|-------------|------------|------------|-------------------------|-------------------------|-------------------------|-------------------------|-------------------------|-------------------------|
| <b>Group</b> | <b>-1</b>   | <b>8</b>   | <b>16</b>  | <b>17</b>               | <b>18</b>               | <b>19</b>               | <b>20</b>               | <b>21</b>               | <b>22</b>               |
| Rehab        | 8.23±0.55   | 28.29±0.95 | 27.23±1.16 | 24.85±1.06              | 23.74±0.70              | 23.95±1.06              | 24.14±1.19              | 23.38±1.10              | 23.34±0.89              |
| VNS+Rehab    | 7.88±0.44   | 27.57±0.81 | 26.55±0.75 | 16.77±1.18              | 16.88±1.78              | 14.50±1.65              | 13.23±2.10              | 11.24±1.70              | 14.05±2.08              |
| p-value      | 0.63        | 0.57       | 0.81       | 1.41 x 10 <sup>-4</sup> | 5.39 x 10 <sup>-3</sup> | 3.74 x 10 <sup>-4</sup> | 7.91 x 10 <sup>-4</sup> | 3.88 x 10 <sup>-5</sup> | 2.08 x 10 <sup>-3</sup> |

*ITT analysis including all subjects from Table 1. Data are mean ± SEM. P values represent an unpaired t-test across groups at each time point.*

**Table 3. Left (uninjured) forelimb withdrawal threshold**

| Animal ID | Group     | Week  |       |       |       |       |       |       |       |       |       |       |       |       |
|-----------|-----------|-------|-------|-------|-------|-------|-------|-------|-------|-------|-------|-------|-------|-------|
|           |           | -1    | 8     | 16    | 17    | 18    | 19    | 20    | 21    | 22    | 24    | 26    | 28    | 30    |
| 1         | Rehab     | 8.00  | 11.50 | 7.80  | 6.80  | 8.80  | 8.90  | 11.40 | 5.30  | 5.00  | 8.60  | 6.10  | 5.30  | 5.90  |
| 2         | Rehab     | 6.50  | 10.34 | 10.90 | 6.50  | 9.40  | 10.60 | 5.70  | 6.50  | 6.60  | 8.70  | 6.70  | 5.50  | 5.60  |
| 3         | Rehab     | 7.00  | 10.00 | 7.60  | 7.30  | 9.10  | 11.60 | 14.40 | 5.50  | 13.60 | 6.70  | 7.40  | 6.20  | 5.20  |
| 4         | Rehab     | 8.33  | 6.50  | 10.40 | 10.10 | 10.50 | 8.90  | 6.50  | 6.80  | 9.30  | 6.40  | 7.50  | 6.90  | 9.10  |
| 5         | Rehab     | 6.00  | 9.83  | 9.82  | 11.60 | 10.10 | 8.40  | 11.80 | 4.50  | 5.00  | 6.10  | 5.80  | 6.90  | 7.30  |
| 6         | Rehab     | 9.80  | 5.00  | 9.80  | 10.10 | 8.60  | 9.50  | 6.70  | 7.90  | 7.30  | 7.10  | 12.80 | 7.60  | 5.70  |
| 7         | Rehab     | 10.54 | 6.00  | 9.70  | 10.10 | 7.90  | 10.30 | 4.90  | 5.30  | 8.20  | 6.40  | 6.90  | 6.90  | 7.10  |
| 8         | Rehab     | 8.50  | 4.67  | 7.40  | 8.10  | 8.50  | 9.90  | 6.40  | 10.90 | 8.60  | 13.60 | 8.80  | 5.30  | 8.30  |
| 9         | VNS+Rehab | 7.33  | 8.80  | 7.40  | 10.20 | 9.50  | 8.10  | 14.10 | 14.70 | 5.10  | 8.40  | 6.50  | 4.50  | 6.90  |
| 10        | VNS+Rehab | 8.83  | 10.17 | 4.50  | 8.40  | 10.10 | 4.40  | 6.90  | 7.10  | 7.70  | 7.00  | 5.80  | 5.20  | 6.50  |
| 11        | VNS+Rehab | 7.00  | 7.83  | 10.20 | 11.20 | 9.30  | 14.40 | 5.30  | 8.80  | 9.40  | 6.70  | 8.30  | 6.70  | 7.90  |
| 12        | VNS+Rehab | 8.50  | 8.33  | 6.70  | 8.30  | 7.70  | 4.20  | 3.30  | 6.50  | 4.50  | 7.70  | 5.10  | 6.30  | 11.40 |
| 13        | VNS+Rehab | 6.50  | 5.00  | 7.00  | 10.30 | 6.20  | 5.50  | 9.60  | 15.20 | 12.80 | 6.60  | 5.70  | 5.80  | 7.60  |
| 14        | VNS+Rehab | 10.50 | 5.67  | 10.80 | 5.20  | 5.90  | 11.70 | 6.50  | 4.80  | 8.50  | 5.80  | 5.20  | 8.50  | 6.50  |
| 15        | VNS+Rehab | 7.08  | 6.67  | 8.10  | 6.20  | 3.50  | 4.30  | 6.70  | 6.80  | 6.50  | 6.30  | 7.00  | 5.60  | 7.40  |
| 16        | VNS+Rehab | 9.00  | 7.33  | 8.00  | 8.00  | 7.50  | 4.10  | 9.80  | 5.10  | 8.20  | 8.00  | 10.30 | 10.80 | 10.60 |
| 17        | VNS+Rehab | 8.10  | 6.00  | 9.40  | 8.70  | 6.40  | 12.40 | 7.40  | 6.50  | 5.90  | 8.30  | 9.40  | 5.30  | 6.80  |

*All forces in grams*

**Table 4. Percentage right paw use on the cylinder task**

| Animal ID | Group     | Week  |       |       |       |       |       |       |
|-----------|-----------|-------|-------|-------|-------|-------|-------|-------|
|           |           | -1    | 16    | 22    | 24    | 26    | 28    | 30    |
| 1         | Rehab     | 43.0% | 31.4% | 30.8% | 38.8% | 35.4% | 35.4% | 32.3% |
| 2         | Rehab     | 44.3% | 19.2% | 8.3%  | 25.0% | 16.7% | 16.7% | 0.0%  |
| 3         | Rehab     | 53.1% | 33.3% | 34.4% | 31.3% | 36.4% | 36.4% | 41.7% |
| 4         | Rehab     | 46.9% | 22.6% | 30.4% | 40.0% | 38.5% | 33.3% | 44.4% |
| 5         | Rehab     | 46.6% | 27.5% | 33.3% | 40.0% | 31.3% | 29.7% | 35.3% |
| 6         | Rehab     | 50.3% | 30.6% | 35.1% | 37.3% | 26.7% | 36.8% | 21.2% |
| 7         | Rehab     | 43.8% | 25.0% | 21.4% | 22.2% | 25.0% | 0.0%  | 31.3% |
| 8         | Rehab     | 48.3% | 25.0% | 35.0% | 41.4% | 14.3% | 16.7% | 28.6% |
| 9         | VNS+Rehab | 51.2% | 28.8% | 56.3% | 57.1% | 54.5% | 53.8% | 45.2% |
| 10        | VNS+Rehab | 50.0% | 27.1% | 43.1% | 42.9% | 47.6% | 47.1% | 46.2% |
| 11        | VNS+Rehab | 42.9% | 36.4% | 46.2% | 44.8% | 31.6% | 43.5% | 44.4% |
| 12        | VNS+Rehab | 50.4% | 31.3% | 49.0% | 40.0% | 57.1% | 57.1% | 33.3% |
| 13        | VNS+Rehab | 52.4% | 34.3% | 56.3% | 60.0% | 52.2% | 53.8% | 41.2% |
| 14        | VNS+Rehab | 44.0% | 35.9% | 50.0% | 47.5% | 44.0% | 43.6% | 41.4% |
| 15        | VNS+Rehab | 50.4% | 23.1% | 43.8% | 58.3% | 50.0% | 42.9% | 50.0% |
| 16        | VNS+Rehab | 42.1% | 31.3% | 50.0% | 41.7% | 36.4% | 33.3% | 33.3% |
| 17        | VNS+Rehab | 52.3% | 28.6% | 61.1% | 49.2% | 50.9% | 53.1% | 53.4% |

**Table 5. Right forepaw grip strength**

| Animal ID | Group     | Week   |        |        |        |        |        |        |
|-----------|-----------|--------|--------|--------|--------|--------|--------|--------|
|           |           | -1     | 16     | 22     | 24     | 26     | 28     | 30     |
| 1         | Rehab     | 848.15 | 192.26 | 118.64 | 33.21  | 466.68 | 508.05 | 511.91 |
| 2         | Rehab     | 855.45 | 299.96 | 12.87  | 26.57  | 496.90 | 630.42 | 692.04 |
| 3         | Rehab     | 499.45 | 115.43 | 42.39  | 69.21  | 433.03 | 479.12 | 503.98 |
| 4         | Rehab     | 945.48 | 205.11 | 261.40 | 311.92 | 414.81 | 398.16 | 442.74 |
| 5         | Rehab     | 501.45 | 216.80 | 73.67  | 344.04 | 108.87 | 385.74 | 276.51 |
| 6         | Rehab     | 955.16 | 122.42 | 229.62 | 137.11 | 330.89 | 171.41 | 258.99 |
| 7         | Rehab     | 571.29 | 176.10 | 214.97 | 459.07 | 389.89 | 354.78 | 395.63 |
| 8         | Rehab     | 477.48 | 281.82 | 237.56 | 420.27 | 415.15 | 464.15 | 371.28 |
| 9         | VNS+Rehab | 885.14 | 223.79 | 89.15  | 25.56  | 550.74 | 553.74 | 591.18 |
| 10        | VNS+Rehab | 855.10 | 291.30 | 382.90 | 404.20 | 441.44 | 431.19 | 414.15 |
| 11        | VNS+Rehab | 912.15 | 351.60 | 381.61 | 618.82 | 759.22 | 608.47 | 636.27 |
| 12        | VNS+Rehab | 814.45 | 205.15 | 379.30 | 382.72 | 477.39 | 411.37 | 383.39 |
| 13        | VNS+Rehab | 515.15 | 324.81 | 19.11  | 55.27  | 17.81  | 55.13  | 129.09 |
| 14        | VNS+Rehab | 845.15 | 88.98  | 268.66 | 51.83  | 293.20 | 273.89 | 249.27 |
| 15        | VNS+Rehab | 405.06 | 45.00  | 278.15 | 484.41 | 445.94 | 391.01 | 447.34 |
| 16        | VNS+Rehab | 515.09 | 23.93  | 290.75 | 272.28 | 423.61 | 399.36 | 519.87 |
| 17        | VNS+Rehab | 489.26 | 248.16 | 244.63 | 221.33 | 232.24 | 248.21 | 310.33 |

*All forces in grams*

**Table 6. Forepaw toe spread distance**

| <b>Animal ID</b> | <b>Group</b> | <b>Left</b> | <b>Right</b> |
|------------------|--------------|-------------|--------------|
| 1                | Rehab        | 16.9        | 11.1         |
| 2                | Rehab        | 19.6        | 11.0         |
| 3                | Rehab        | 20.2        | 13.4         |
| 4                | Rehab        | 19.9        | 12.5         |
| 5                | Rehab        | 19.4        | 13.0         |
| 6                | Rehab        | 19.2        | 9.7          |
| 7                | Rehab        | 18.0        | 10.9         |
| 8                | Rehab        | 16.4        | 13.2         |
| 9                | VNS+Rehab    | 19.6        | 15.9         |
| 10               | VNS+Rehab    | 19.2        | 14.1         |
| 11               | VNS+Rehab    | 17.7        | 13.6         |
| 12               | VNS+Rehab    | 19.7        | 15.2         |
| 13               | VNS+Rehab    | 19.9        | 15.4         |
| 14               | VNS+Rehab    | 19.6        | 13.9         |
| 15               | VNS+Rehab    | 19.7        | 17.1         |
| 16               | VNS+Rehab    | 16.9        | 14.6         |
| 17               | VNS+Rehab    | ‡           | ‡            |

All distances in mm; ‡ denotes missing data due to technical issues

**Table 7. Percentage of steps with slips or misses on the horizontal ladder task**

| <b>Animal ID</b> | <b>Group</b> |       |
|------------------|--------------|-------|
| 1                | Rehab        | 29.6% |
| 2                | Rehab        | 16.7% |
| 3                | Rehab        | 15.9% |
| 4                | Rehab        | 16.5% |
| 5                | Rehab        | 19.4% |
| 6                | Rehab        | 25.4% |
| 7                | Rehab        | 20.6% |
| 8                | Rehab        | 23.5% |
| 9                | VNS+Rehab    | 2.2%  |
| 10               | VNS+Rehab    | 4.4%  |
| 11               | VNS+Rehab    | 6.3%  |
| 12               | VNS+Rehab    | 7.4%  |
| 13               | VNS+Rehab    | 18.1% |
| 14               | VNS+Rehab    | 11.4% |
| 15               | VNS+Rehab    | 13.2% |
| 16               | VNS+Rehab    | 7.0%  |
| 17               | VNS+Rehab    | 4.8%  |



### **Video S1. Delivery of Tactile Rehabilitation**

Example of the delivery of all four tactile stimuli used during tactile rehabilitation. The animal on the left is receiving VNS paired with tactile rehabilitation while the animal on the right is receiving tactile rehabilitation alone. The VNS indicator turns yellow when VNS is delivered.
